# Supplementary figures and images for: Fabrication of surface-active antioxidant biopolymers by using a grafted scallop (Patinopecten yessoensis) gonad protein isolate–epigallocatechin gallate (EGCG) conjugate: improving the stability of tuna oil-loaded emulsions
Source: Royal Society of Chemistry journal article supplement (doi:10.1039/c9fo01723b), 2019-01-01

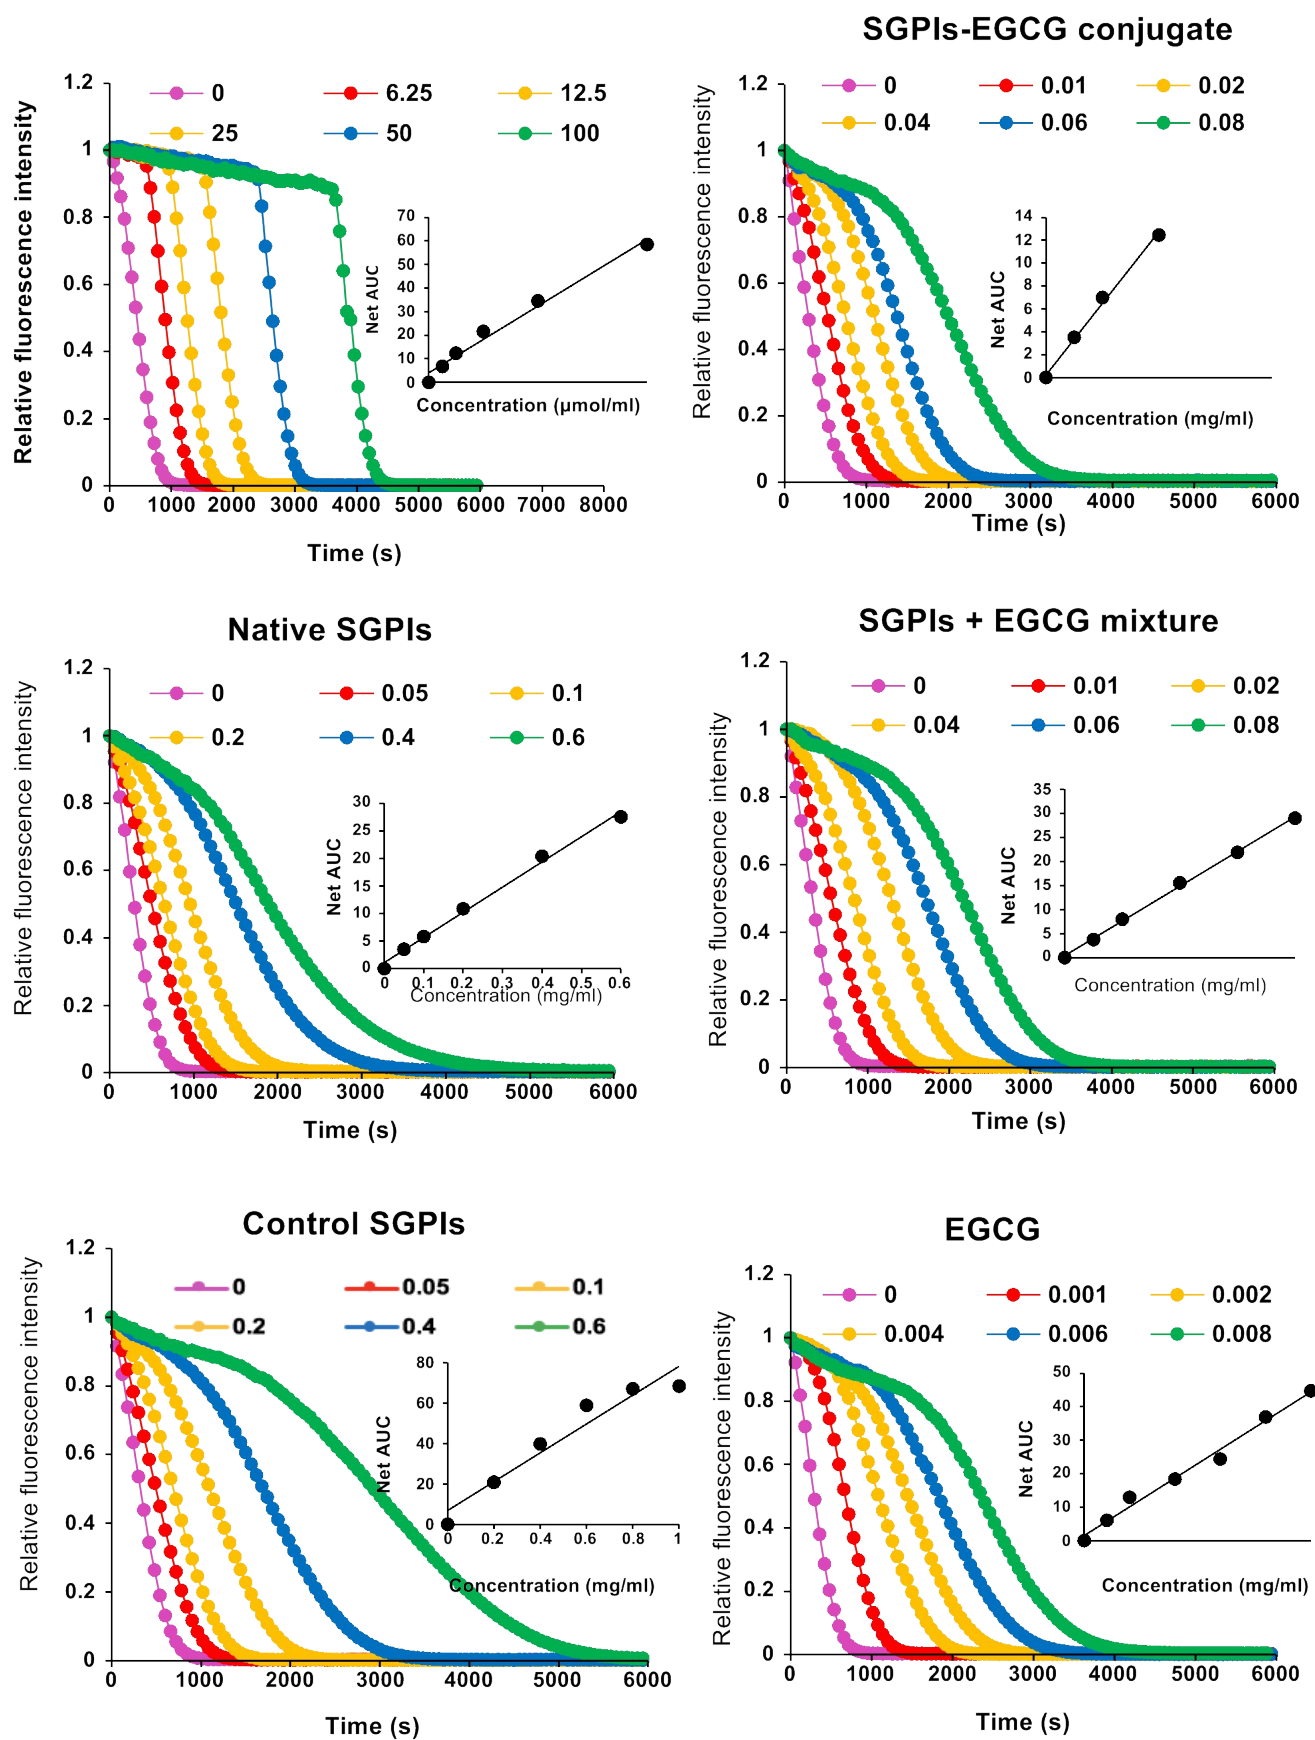

**Fig. S1**

Supplement: c9fo01723b1.pdf [file c9fo01723b1.pdf]
